1 **Abundance of Nef and p-Tau217 in brains of individuals diagnosed with HIV-associated**  
2 **neurocognitive disorders correlate with disease severance**

3  
4 Tatiana Pushkarsky<sup>1</sup>, Adam Ward<sup>1,2,3</sup>, Dmitri Sviridov<sup>4,5</sup>, Michael I Bukrinsky<sup>1</sup>

5  
6 <sup>1</sup>The George Washington University School of Medicine and Health Sciences, Washington,  
7 District of Columbia, USA

8 <sup>2</sup>The George Washington University Milken Institute School of Public Health, Washington,  
9 District of Columbia, USA

10 <sup>3</sup>Division of Infectious Diseases, Weill Cornell Medicine, New York, New York, USA

11 <sup>4</sup>Baker Heart and Diabetes Institute, Melbourne, Victoria, Australia

12 <sup>5</sup>Department of Biochemistry and Molecular Biology, Monash University, Clayton, Victoria,  
13 Australia

14  
15 Short title: p-Tau217 and lipid rafts accumulate in HAND brains

16

17 To whom correspondence should be addressed at mbukrins@gwu.edu.

18

19

20

21 **Abstract**

22 HIV-associated neurological disorders (HAND) is a term used to describe a variety of  
23 neurological impairments observed in HIV-infected individuals. The pathogenic mechanisms of  
24 HAND and its connection to HIV infection remain unknown. The brain samples from HIV-  
25 infected individuals, both with and without HAND, were characterized by increased abundance  
26 of p-Tau217 peptide, which correlated with the abundance of flotillin 1, a marker of lipid rafts.  
27 HIV-1 Nef was detected in some, but not all, samples from HAND-affected individuals. Samples  
28 positive for Nef had lower abundance of cholesterol transporter ABCA1, higher abundance of  
29 flotillin 1 and p-Tau217, and were obtained from individuals with higher severity of HAND  
30 relative to Nef-negative samples. These results highlight the contribution of Nef and Nef-  
31 dependent effects on cholesterol metabolism and lipid rafts to the pathogenesis of HAND and  
32 support a connection between pathogenesis of HAND and Alzheimer's disease.

33

34 Key words: HIV-1; HAND; Nef; p-Tau217; lipid rafts; ABCA1; cholesterol

35

## 36 **Introduction**

37 HIV-associated neurological disorders (HAND) have clinical hallmarks of a  
38 neurodegenerative disease with progressive cognitive decline reflected initially by neuronal  
39 dendritic simplification and ultimately by the neuronal loss [1]. With the introduction of  
40 combination anti-retroviral therapy (cART), prevalence of the severe form of HAND, HIV-  
41 associated dementia (HAD), has diminished, but that of milder forms, mild neurocognitive  
42 disorder (MND) and especially asymptomatic neurocognitive impairment (ANI), have increased  
43 [2], suggesting that cART slows progression, but does not prevent initiation of the disease. The  
44 reasons for this persistence are not fully understood and several possible explanations have been  
45 suggested (reviewed in [3, 4]). One of the mechanisms gaining support in the recent studies links  
46 HAND pathogenesis to beta amyloid, suggesting a connection between HAND and Alzheimer's  
47 disease (reviewed in [5]). HAND has many similarities to Alzheimer's disease (AD), such as  
48 neuroinflammation, similar transcriptional signatures, and increased abundance and changed  
49 localization of intracellular beta amyloid (A $\beta$ ), a critical component in AD pathogenesis [5-8].  
50 While the possibility that HIV infection "speeds up" the underlying AD is an attractive  
51 hypothesis, the mechanisms of this connection remain unclear. Described below are results of  
52 our previous studies of the effects of Nef on cellular cholesterol metabolism and lipid rafts,  
53 which provide a plausible mechanism.

54 Expression of Nef in HIV-infected cells induces degradation of the key cellular  
55 cholesterol transporter ABCA1, causing suppression of cholesterol efflux and increasing  
56 abundance of the lipid rafts [9, 10]. Most importantly, the same activity was demonstrated for the  
57 Nef-carrying extracellular vesicles [11, 12], which continue to be released into circulation and  
58 the brain from HIV-infected cells even after suppression of HIV replication by cART [7, 13, 14].

59 Amyloidogenic proteins concentrate in the lipid rafts [15], and most amyloid proteins involved in  
60 pathogenesis of neurodegeneration are raft proteins [16-18]. High local concentration of  
61 amyloidogenic proteins is a prerequisite for the effective nucleation and cascading progression of  
62 their misfolding, a key pathogenic element of neurodegeneration. Therefore, upregulation of the  
63 lipid rafts by Nef or Nef-containing extracellular vesicles and accumulation of amyloidogenic  
64 proteins in the rafts may accelerate the progress of their misfolding and promote its spread  
65 through the brain. A similar mechanism has been shown for prions, which also promote lipid raft  
66 formation and depend on lipid rafts for progression of prion misfolding [19].

67 In this study, we demonstrated associations between the presence of Nef with reduced  
68 levels of ABCA1, increased abundance of flotillin 1, disease severity, and the increased  
69 abundance of p-Tau217 - which is a characteristic marker of the Alzheimer's disease [20-22].  
70 Our findings support the proposed mechanism of HAND whereby Nef-mediated suppression of  
71 ABCA1 increases the abundance of lipid rafts, which in turn enables the progression of  
72 tauopathy.

73

## 74 **Materials and Methods**

75 *Brain samples:* Fresh-frozen post-mortem samples from hippocampus or mid-temporal gyrus of  
76 HIV-infected individuals with or without HAND diagnosis were obtained from National  
77 NeuroAIDS Tissue Consortium (NNTC). Brain samples from uninfected individuals without  
78 neurodegenerative disease diagnosis were obtained from the National Institutes of Health  
79 NeuroBioBank. All samples were deidentified, and provided clinical information is presented in  
80 Table S1. The studies abided by the Declaration of Helsinki principles.

81

82 *Western blot analysis:* Samples were analyzed by automated Western immunoblotting using the  
83 Jess<sup>TM</sup> Simple Western system (ProteinSimple, San Jose, CA). For analysis of ABCA1, a 66-440  
84 kDa Jess separation module (SM-W008) was used, for Nef – a 2-40 kDa module (SM-W012),  
85 for p-Tau217 and Flotillin 1 – 12 - 230 kDa module (SM-W004). Three  $\mu$ L of brain lysates (1  
86  $\mu$ g/ $\mu$ L protein) was mixed with 1  $\mu$ L of Fluorescent 5X Master mix (ProteinSimple) in the  
87 presence of fluorescent molecular weight markers and 400 mM dithiothreitol (ProteinSimple).  
88 This preparation was denatured at 95°C for 5 min for Nef, p-Tau217 and Flotillin 1 analysis. For  
89 ABCA1, the mix was incubated at 37°C for 15 min. Molecular weight ladder and proteins were  
90 separated in capillaries through a separation matrix at 375 volts. A ProteinSimple proprietary  
91 photoactivated capture chemistry was used to immobilize separated viral proteins on the  
92 capillaries. Capillaries with immobilized proteins were blocked with KPL Detection Block (5X)  
93 (SeraCare Life Sciences, Gaithersburg, MD, cat. #5920-0004) for 60 min, and then incubated  
94 with antibodies for 60 min. After a wash step, HRP-conjugated goat anti-rabbit (cat. #042-206),  
95 donkey anti-goat (cat. #043-522-2), or goat anti-mouse antibodies (cat. #042-205) from  
96 ProteinSimple were added for 30 min. The chemiluminescent revelation was established with  
97 peroxide/luminol-S (ProteinSimple). Digital image of chemiluminescence of the capillary was  
98 captured with Compass Simple Western software (version 5.1.0, Protein Simple) that calculated  
99 automatically heights (chemiluminescence intensity), area, and signal/noise ratio. Results were  
100 visualized as electropherograms representing peak of chemiluminescence intensity and as lane  
101 view from signal of chemiluminescence detected in the capillary. A total protein assay using  
102 Total Protein detection module DM-TP01 and Replex Module RP-001 was included in each run  
103 to quantitate loading.

104

105 *Antibodies:* For Nef detection, the following mouse monoclonal antibodies were used: 3D12  
106 (ABCAM ab42355) against amino acids <sup>35</sup>RDLEKHGAISSNTAA<sup>50</sup> of HIV-1 HXB2; EH1  
107 (AIDS reagents #ARP-3689) against <sup>194</sup>MARELHPEYYKDC<sup>206</sup> of HIV-1 B subtype consensus;  
108 SN20 (gift from Dr. Bernhard Maier, Indiana University) against the SH3 binding domain of Nef  
109 (FPVTPQ); and 6JR (ABCAM ab42358) mapped to <sup>195</sup>ARELHPEYYKD<sup>205</sup> of the HIV-1 B  
110 subtype consensus. P-Tau217 was detected using the rabbit polyclonal antibody to Tau  
111 phosphorylated on Threonine 217 (ThermoFisher (Waltham, MA), cat. #44744); ABCA1 – using  
112 mouse monoclonal anti-ABCA1 antibody H10 (Abcam (Cambridge, MA), cat. #ab18180); and  
113 flotillin 1 – using goat anti-flotillin 1 polyclonal antibody (Novus Biologicals (Littleton, Co), cat.  
114 #NB1001043).

115

116 *Statistics:* Statistical analyses including Spearman correlations, Wilcoxon rank-sum tests,  
117 Kruskal-Wallis test with DSCF multiple comparisons option, and multivariate linear regression  
118 were conducted in SAS v9.4. Data visualization was conducted in GraphPad PRISM v.9. For  
119 multivariate analysis, Box Cox transformation of variables was performed in SAS v9.4 prior to  
120 regression. Figure captions describe the statistical test used.

121

## 122 **Results**

123 The role of amyloid proteins in pathogenesis of HAND has been previously suggested  
124 [23-25]. Our earlier study of a small number of postmortem brain samples from HAND patients  
125 found a trend towards increased abundance of APP and Tau relative to samples from uninfected  
126 individuals [11]. To substantiate this finding, we now analyzed postmortem brain samples from  
127 22 HIV-infected individuals diagnosed with HAND, 11 HIV-infected individuals without HAND

128 diagnosis, and 12 uninfected controls without diagnosed neurological disease (Table S1) for Tau  
129 protein phosphorylated on Threonine 217 (p-Tau217). This Tau isoform has been shown to  
130 strongly correlate with A $\beta$  deposition [26] and was proposed as a marker for Alzheimer's disease  
131 [20, 27, 28]. Results presented in Fig. 1A demonstrate that the abundance of p-Tau217, measured  
132 by quantitative automated capillary Western blot, was significantly increased in samples from  
133 HIV-infected individuals with HAND diagnosis, relative to HIV-infected individuals without  
134 HAND diagnosis and especially relative to uninfected controls (supporting Western blot  
135 evidence is presented in supplementary Fig. S1). Significant difference in the abundance of this  
136 peptide was also observed between samples from HIV-infected individuals without HAND  
137 diagnosis and uninfected controls (Fig. 1A). Given that p-Tau217 is an early marker of  
138 neurodegeneration and Alzheimer's [20, 27, 28], these results are consistent with the role of  
139 phosphorylated Tau in HAND pathogenesis and suggest that increase in this factor may precede  
140 HAND diagnosis.

141 Amyloidogenic proteins and amyloid peptides are associated with lipid rafts [29-33], and  
142 our previous study suggested that increased abundance of lipid rafts caused by Nef-containing  
143 extracellular vesicles (exNef) may be the reason for the upregulation of APP and Tau [11].  
144 Unfortunately, immunohistochemical analysis of lipid rafts in fresh-frozen tissue blocks was  
145 technically challenging. We evaluated the abundance of lipid rafts in the brain tissue samples by  
146 measuring the lipid raft marker flotillin 1 (by quantitative Western blot). Results of these  
147 analyses are presented in Fig. S2. Although there was no difference in the abundance of flotillin  
148 1 between brain samples from HIV-infected HAND-positive or HAND-negative individuals vs  
149 uninfected individuals (Fig. S3), the abundance of p-Tau217 in HAND brain samples  
150 significantly correlated with the abundance of flotillin 1 (Fig. 1B). This result is consistent with

151 the proposed relationship between lipid rafts and amyloid peptides [11, 32]. Of note, no such  
152 correlation was observed in samples from uninfected brains, or brains from HIV-infected  
153 individuals without HAND diagnosis (Fig. S4), suggesting that the relationship between rafts and  
154 p-Tau217 formation is changed in HAND.

155 Results above suggest that abundance p-Tau217 in HAND brains may be associated with  
156 the abundance of flotillin 1 and, by extension, of lipid rafts. Previous studies suggested that  
157 downmodulation of ABCA1 in macrophages infected with HIV-1 or treated with exNef regulates  
158 the abundance of lipid rafts [10-12, 34]. Our analysis showed a negative correlation between the  
159 quantity of ABCA1 in all samples and the quantity of flotillin 1 (Fig. 1C). Comparison of  
160 ABCA1 abundance between all samples from HIV-infected individuals to samples from  
161 uninfected controls showed a trend towards reduced ABCA1 in the brains from infected  
162 individuals, although the statistical significance was not achieved (Fig. 1D, supporting Western  
163 blot evidence is in Fig. S5).

164 A known problem with detection of Nef in biological samples is that Nef proteins from  
165 different HIV-1 strains have vastly varying ability to interact with different antibodies,  
166 significantly affecting accuracy of comparison of the abundance of Nef between infected  
167 participants. In addition, low specificity of most anti-Nef antibodies makes detection of low Nef  
168 concentrations in clinical samples challenging. To get around these limitations, we detected Nef  
169 in the brain samples by Western blot using four different antibodies raised against conservative  
170 epitopes in different Nef regions: 3D12 mapped to the N-terminus region of HXB2 Nef, EH1  
171 mapped to the C-terminus region, SN20 mapped to the SH3-binding domain of Nef, and 6JR  
172 mapped to the C-terminus region (see Materials and Methods). Analysis with 3D12, SN20, and  
173 EH1 antibodies was performed with all samples, except HIV 40, HIV 42, HIV 43, HAND 41,



174 HAND 44, HAND 45, and showed some cross-reactivity with cellular proteins in uninfected  
175 samples (Fig. S6). All samples were analyzed using the 6JR antibody, which provided the  
176 cleanest results, with least cross-reactivity with cellular proteins and negative results with all  
177 uninfected samples (Fig. 2), and was used for the final interpretation of the Nef status. Table 1  
178 summarizes results of this analysis. Eight of 22 HAND samples were Nef-positive, whereas only  
179 one sample from HIV-positive individual without HAND diagnosis (HIV 19) was positive.

180 We further separated HAND samples into two groups, Nef-positive and Nef-negative,  
181 and compared these groups for expression of ABCA1, flotillin 1, p-Tau217, and HAND severity  
182 according to the clinical score (Fig. 3). Samples positive for Nef had lower abundance of  
183 ABCA1 (Fig. 3A), higher abundance of flotillin (Fig. 3B), and higher abundance of p-Tau217  
184 (Fig. 3C) relative to HAND samples with undetectable Nef. To determine whether the observed  
185 differences were associated with the disease status, we compared the clinical HAND scores  
186 between subjects providing the Nef-positive and Nef-negative brain samples. Clinical  
187 neurological status was assessed using three existing dementia rating scales, American Academy  
188 of Neurology (AAN), Memorial Sloan Kettering (MSK), and Frascati; the scales were not  
189 universally applied to all individuals and in some cases disagreed (Table S1). Although a good  
190 concordance between these scales has been reported, Frascati provided a more graded evaluation,  
191 especially for mild cases [35]. We therefore used the Frascati score, where available, to grade the  
192 clinical status, and the AAN score in the other cases (Table 2). The HAND clinical score was  
193 significantly higher in individuals providing Nef-positive samples relative to individuals  
194 providing samples with undetectable Nef (Fig. 3D), indicating that presence of Nef was  
195 associated with a more severe disease. Multivariate regression analysis demonstrated that the  
196 effect of detectable Nef on all continuous outcome variables (ABCA1, flotillin 1, p-Tau217)

197 considered jointly was significant in all HIV-infected individuals, in both the unadjusted model  
198 and the adjusted model controlling for age, HIV duration, and viral load (Table S2). The  
199 difference in results between analysis of all samples from HIV-positive individuals and those  
200 from HAND only may be due to the smaller sample size in HAND only set.

201 Taken together, these results suggest that Nef, via modification of cholesterol metabolism  
202 and lipid rafts may be one of the key causative factors promoting amyloid formation and disease  
203 progression in HAND.

204

## 205 **Discussion**

206 The role of amyloid proteins in HAND pathogenesis remains an open question. In this  
207 study, we demonstrated a significant increase in the brains of HIV-infected individuals of the  
208 abundance of p-Tau217, which is also involved in pathogenesis of Alzheimer's disease [36].  
209 This finding is consistent with our previous report where *in vitro* analysis suggested increased  
210 abundance of amyloid precursor proteins and Tau in exNef-treated neuronal cells [11].  
211 Surprisingly, this was true for brain samples from both HAND-diagnosed and HAND-free HIV-  
212 infected individuals. One explanation is that HIV-infected individuals without HAND diagnosis  
213 were at an early stage of disease when clinical manifestations could not yet be detected. This  
214 explanation is consistent with a demonstrated utility of p-Tau217 as an early marker of  
215 Alzheimer's, which allows detection of the disease at the stage preceding neurodegeneration and  
216 clinical symptoms [37].

217 In these studies, we measured total flotillin 1 to evaluate the abundance of the lipid rafts.  
218 Flotillins 1 and 2 are integral membrane proteins that assist in raft assembly [38-40]. While  
219 flotillin 1 can be recruited to lipid rafts under certain stimulatory conditions [41], suggesting that

220 the number of flotillin molecules per lipid raft may vary, the level of flotillin expression, and  
221 thus the per cell abundance of flotillin, appears to regulate the abundance of lipid rafts [42].  
222 Therefore, the abundance of total flotillin 1 provides only a crude estimate of the abundance of  
223 lipid rafts. This limitation is taken in the account in our interpretations.

224 Tau hyperphosphorylation is a characteristic feature of Alzheimer's disease, and a  
225 number of studies established that phosphorylation of Tau in AD is closely linked to A $\beta$   
226 pathology [26, 43, 44]. Lipid rafts were proposed to be the sites where Tau phosphorylation takes  
227 place, and where phosphorylated Tau accumulates and interacts with A $\beta$  during development of  
228 Alzheimer's disease [33]. The observed correlation between abundancies of flotillin 1 and p-  
229 Tau217 may reflect this paradigm, suggesting that lipid rafts may be a target for potential  
230 therapeutic interventions in HAND, as had been proposed for other neurodegenerative diseases  
231 [45]. We recognize, however, that, as discussed above, abundance of flotillin 1 provides only a  
232 crude estimate of the abundance of lipid rafts, which may be the reason for low flotillin 1 in  
233 some brain samples from subjects diagnosed with HAND, and high flotillin 1 in some samples  
234 from HIV-infected individuals without the HAND diagnosis. But the most likely explanation for  
235 this variability is that a driving factor in HAND pathogenesis is not the absolute amount, but the  
236 change in the quality and quantity of the lipid rafts during disease progression. Our previous  
237 studies documented functional impairment of lipid rafts associated with the effect of Nef [10],  
238 which may occur without a major change in the raft abundance. We have previously reported  
239 that exNef modify the fatty acid content of the lipid rafts [12], although the functional  
240 consequences of these changes have not been investigated. Prospective studies will be needed to  
241 evaluate this idea.

242           Our analysis demonstrated that majority of samples where Nef could be detected came  
243 from individuals with diagnosed HAND. This result suggests an important role of Nef in HAND  
244 pathogenesis. Indeed, Nef-positive samples were characterized by reduced ABCA1, increased  
245 flotillin 1, increased p-Tau217, and increased clinical disease score. These results suggest that  
246 Nef may drive ABCA1 downmodulation in HAND initiating lipid raft modifications and  
247 subsequent pathological events.

248           A limitation of this study is a relatively small number of samples available for analysis.  
249 Since samples were not cryopreserved, we could not perform flow cytometry analysis of the lipid  
250 rafts, or cell-specific characterizations. Another limitation is lack of a sensitive quantitative assay  
251 for Nef. Despite these limitations, our study supports the pathogenic role of Tau in HAND  
252 pathogenesis, and suggests the sequence of events that lead to HAND: Nef EVs downmodulate  
253 ABCA1 changing the properties of the lipid rafts, thus increasing formation of amyloid plaques  
254 and Tau phosphorylation and fibrillation. Future studies in animal models will establish the  
255 temporality of this ordering and will determine whether therapeutic treatments breaking the  
256 pathogenic course described above can prevent development of HAND.

257

258 **Author Declarations**

259 *Ethics approval and consent to participate:* Not applicable. Anonymized samples were received  
260 from repositories.

261 *Consent for publication:* All authors received the final version of the manuscript and agreed to  
262 publish it.

263 *Availability of data and materials:* All the data are presented in the manuscript as the main or  
264 supplementary material. The sources of materials are provided.

265 *Competing interests:* The authors declare no competing interests.

266 *Funding:* This work was supported NIH grants R01NS102163 (MIB), R01HL131473 (MIB,  
267 DS), R01HL158305 (MIB, DS) and P30AI117970 (MIB).

268 *Authors' contributions:* TP performed the experiments and contributed to data analysis and  
269 interpretation; AW performed statistical analysis; DS contributed to research design, results'  
270 interpretation, and manuscript preparation; MIB designed the experiments, contributed to results'  
271 interpretation, wrote the manuscript.

272 *Acknowledgements:* We are thankful to Drs. Matthias Clauss and Bernhard Maier (Indiana  
273 University and Purdue University Indianapolis) for anti-Nef antibody SN20. The following  
274 reagent was obtained through the NIH HIV Reagent Program, Division of AIDS, NIAID, NIH:  
275 Anti-Human Immunodeficiency Virus 1 (HIV-1) Nef Monoclonal (EH1), ARP-3689,  
276 contributed by Dr. James Hoxie. We are thankful to NIH NeuroBioBank for providing brain  
277 samples from uninfected individuals. The brain samples from HIV-infected individuals with and  
278 without HAND diagnosis were provided by The National NeuroAIDS Tissue Consortium  
279 (NNTC) supported by shared resources from NIH funding through the NIMH and NINDS by the  
280 following grants: Manhattan HIV Brain Bank (U24MH100931), Texas NeuroAIDS Research

281 Center (U24MH100930) National Neurological AIDS Bank (U24MH100929), California  
282 NeuroAIDS Tissue Network (U24MH100928), Data Coordinating Center (U24MH100925).

283 **Compliance with Ethical Standards**

284 *Disclosure of potential conflicts of interest: The authors declare no conflicts of interest.*

285 *Research involving Human Participants and/or Animals:* Human samples analyzed in this study  
286 were anonymized and were provided by NIH-maintained repositories.

287 *Informed consent:* Not applicable.

288

## 289 **References**

- 290 1. Borrajo A, Spuch C, Penedo MA, Olivares JM, Agis-Balboa RC. Important role of microglia in  
291 HIV-1 associated neurocognitive disorders and the molecular pathways implicated in its  
292 pathogenesis. *Ann Med* **2021**; 53:43-69.
- 293 2. Eggers C, Arendt G, Hahn K, et al. HIV-1-associated neurocognitive disorder: epidemiology,  
294 pathogenesis, diagnosis, and treatment. *J Neurol* **2017**; 264:1715-27.
- 295 3. Caruana G, Vidili G, Serra PA, et al. The burden of HIV-associated neurocognitive disorder  
296 (HAND) in post-HAART era: a multidisciplinary review of the literature. *Eur Rev Med Pharmacol*  
297 *Sci* **2017**; 21:2290-301.
- 298 4. Fujioka Y, Nishide S, Ose T, et al. A Sialylated Voltage-Dependent Ca(2+) Channel Binds  
299 Hemagglutinin and Mediates Influenza A Virus Entry into Mammalian Cells. *Cell Host Microbe*  
300 **2018**; 23:809-18 e5.
- 301 5. Fulop T, Witkowski JM, Larbi A, Khalil A, Herbein G, Frost EH. Does HIV infection contribute  
302 to increased beta-amyloid synthesis and plaque formation leading to neurodegeneration and  
303 Alzheimer's disease? *J Neurovirol* **2019**; 25:634-47.
- 304 6. Levine AJ, Miller JA, Shapshak P, et al. Systems analysis of human brain gene expression:  
305 mechanisms for HIV-associated neurocognitive impairment and common pathways with  
306 Alzheimer's disease. *BMC Med Genomics* **2013**; 6:4.
- 307 7. Khan MB, Lang MJ, Huang MB, et al. Nef exosomes isolated from the plasma of individuals  
308 with HIV-associated dementia (HAD) can induce Abeta1-42 secretion in SH-SY5Y neural cells.  
309 *J Neurovirol* **2016**; 22:179-90.
- 310 8. Rosenthal J, Tyor W. Aging, comorbidities, and the importance of finding biomarkers for HIV-  
311 associated neurocognitive disorders. *J Neurovirol* **2019**; 25:673-85.
- 312 9. Mujawar Z, Rose H, Morrow MP, et al. Human immunodeficiency virus impairs reverse  
313 cholesterol transport from macrophages. *PLoS Biol* **2006**; 4:e365.

- 314 10. Cui HL, Grant A, Mukhamedova N, et al. HIV-1 Nef mobilizes lipid rafts in macrophages  
315 through a pathway that competes with ABCA1-dependent cholesterol efflux. *J Lipid Res* **2012**;  
316 53:696-708.
- 317 11. Ditiatkovski M, Mukhamedova N, Dragoljevic D, et al. Modification of lipid rafts by  
318 extracellular vesicles carrying HIV-1 protein Nef induces redistribution of APP and Tau causing  
319 neuronal dysfunction. *J Biol Chem* **2020**; 295:13377-92.
- 320 12. Mukhamedova N, Hoang A, Dragoljevic D, et al. Exosomes containing HIV protein Nef  
321 reorganize lipid rafts potentiating inflammatory response in bystander cells. *PLoS Pathog* **2019**;  
322 15:e1007907.
- 323 13. Raymond AD, Campbell-Sims TC, Khan M, et al. HIV Type 1 Nef is released from infected  
324 cells in CD45(+) microvesicles and is present in the plasma of HIV-infected individuals. *AIDS*  
325 *Res Hum Retroviruses* **2011**; 27:167-78.
- 326 14. Puzar Dominkus P, Ferdin J, Plemenitas A, Peterlin BM, Lenassi M. Nef is secreted in  
327 exosomes from Nef.GFP-expressing and HIV-1-infected human astrocytes. *J Neurovirol* **2017**;  
328 23:713-24.
- 329 15. Malchiodi-Albedi F, Paradisi S, Matteucci A, Frank C, Diociaiuti M. Amyloid oligomer  
330 neurotoxicity, calcium dysregulation, and lipid rafts. *Int J Alzheimers Dis* **2011**; 2011:906964.
- 331 16. Di Scala C, Chahinian H, Yahi N, Garmy N, Fantini J. Interaction of Alzheimer's  $\beta$ -Amyloid  
332 Peptides with Cholesterol: Mechanistic Insights into Amyloid Pore Formation. *Biochemistry*  
333 **2014**; 53:4489-502.
- 334 17. Kim KS, Kim JS, Park JY, et al. DJ-1 associates with lipid rafts by palmitoylation and  
335 regulates lipid rafts-dependent endocytosis in astrocytes. *Hum Mol Genet* **2013**; 22:4805-17.
- 336 18. Valencia A, Reeves PB, Sapp E, et al. Mutant huntingtin and glycogen synthase kinase 3-  
337 beta accumulate in neuronal lipid rafts of a presymptomatic knock-in mouse model of  
338 Huntington's disease. *J Neurosci Res* **2010**; 88:179-90.



- 339 19. Cui HL, Ditiatkovski M, Kesani R, et al. HIV protein Nef causes dyslipidemia and formation  
340 of foam cells in mouse models of atherosclerosis. *FASEB J* **2014**; 28:2828-39.
- 341 20. Janelidze S, Stomrud E, Smith R, et al. Cerebrospinal fluid p-tau217 performs better than p-  
342 tau181 as a biomarker of Alzheimer's disease. *Nat Commun* **2020**; 11:1683.
- 343 21. Janelidze S, Berron D, Smith R, et al. Associations of Plasma Phospho-Tau217 Levels With  
344 Tau Positron Emission Tomography in Early Alzheimer Disease. *JAMA Neurol* **2021**; 78:149-56.
- 345 22. Palmqvist S, Janelidze S, Quiroz YT, et al. Discriminative Accuracy of Plasma Phospho-  
346 tau217 for Alzheimer Disease vs Other Neurodegenerative Disorders. *JAMA* **2020**; 324:772-81.
- 347 23. Mothapo KM, Stelma F, Janssen M, et al. Amyloid beta-42 (A $\beta$ -42), neprilysin and  
348 cytokine levels. A pilot study in patients with HIV related cognitive impairments. *J Neuroimmunol*  
349 **2015**; 282:73-9.
- 350 24. Kodidela S, Gerth K, Haque S, et al. Extracellular Vesicles: A Possible Link between HIV  
351 and Alzheimer's Disease-Like Pathology in HIV Subjects? *Cells* **2019**; 8:968.
- 352 25. Sil S, Hu G, Liao K, et al. HIV-1 Tat-mediated astrocytic amyloidosis involves the HIF-  
353 1 $\alpha$ /lncRNA BACE1-AS axis. *PLoS Biol* **2020**; 18:e3000660.
- 354 26. Sato C, Barthelemy NR, Mawuenyega KG, et al. Tau Kinetics in Neurons and the Human  
355 Central Nervous System. *Neuron* **2018**; 98:861-4.
- 356 27. Mackiewicz MM, Overk C, Achim CL, Masliah E. Pathogenesis of age-related HIV  
357 neurodegeneration. *J Neurovirol* **2019**; 25:622-33.
- 358 28. Pluta R, Ouyang L, Januszewski S, Li Y, Czuczwar SJ. Participation of Amyloid and Tau  
359 Protein in Post-Ischemic Neurodegeneration of the Hippocampus of a Nature Identical to  
360 Alzheimer's Disease. *Int J Mol Sci* **2021**; 22:2460.
- 361 29. Hicks DA, Nalivaeva NN, Turner AJ. Lipid rafts and Alzheimer's disease: protein-lipid  
362 interactions and perturbation of signaling. *Front Physiol* **2012**; 3:189.
- 363 30. Sontag JM, Nunbhakdi-Craig V, Sontag E. Leucine carboxyl methyltransferase 1 (LCMT1)-  
364 dependent methylation regulates the association of protein phosphatase 2A and Tau protein

- 365 with plasma membrane microdomains in neuroblastoma cells. *J Biol Chem* **2013**; 288:27396-  
366 405.
- 367 31. Ehehalt R, Keller P, Haass C, Thiele C, Simons K. Amyloidogenic processing of the  
368 Alzheimer beta-amyloid precursor protein depends on lipid rafts. *J Cell Biol* **2003**; 160:113-23.
- 369 32. Fabiani C, Antollini SS. Alzheimer's Disease as a Membrane Disorder: Spatial Cross-Talk  
370 Among Beta-Amyloid Peptides, Nicotinic Acetylcholine Receptors and Lipid Rafts. *Front Cell*  
371 *Neurosci* **2019**; 13:309.
- 372 33. Kawarabayashi T, Shoji M, Younkin LH, et al. Dimeric amyloid beta protein rapidly  
373 accumulates in lipid rafts followed by apolipoprotein E and phosphorylated tau accumulation in  
374 the Tg2576 mouse model of Alzheimer's disease. *J Neurosci* **2004**; 24:3801-9.
- 375 34. Bocchetta S, Maillard P, Yamamoto M, et al. Up-Regulation of the ATP-Binding Cassette  
376 Transporter A1 Inhibits Hepatitis C Virus Infection. *PLoS One* **2014**; 9:e92140.
- 377 35. Gandhi NS, Moxley RT, Creighton J, et al. Comparison of scales to evaluate the progression  
378 of HIV-associated neurocognitive disorder. *HIV Ther* **2010**; 4:371-9.
- 379 36. Chopra K, Misra S, Kuhad A. Neurobiological aspects of Alzheimer's disease. *Expert Opin*  
380 *Ther Targets* **2011**; 15:535-55.
- 381 37. Barthelemy NR, Li Y, Joseph-Mathurin N, et al. A soluble phosphorylated tau signature links  
382 tau, amyloid and the evolution of stages of dominantly inherited Alzheimer's disease. *Nat Med*  
383 **2020**; 26:398-407.
- 384 38. Slaughter N, Laux I, Tu X, et al. The flotillins are integral membrane proteins in lipid rafts  
385 that contain TCR-associated signaling components: implications for T-cell activation. *Clin*  
386 *Immunol* **2003**; 108:138-51.
- 387 39. Stuermer CA, Plattner H. The 'lipid raft' microdomain proteins reggie-1 and reggie-2  
388 (flotillins) are scaffolds for protein interaction and signalling. *Biochem Soc Symp* **2005**:109-18.
- 389 40. Salzer U, Prohaska R. Stomatin, flotillin-1, and flotillin-2 are major integral proteins of  
390 erythrocyte lipid rafts. *Blood* **2001**; 97:1141-3.

- 391 41. Giri B, Dixit VD, Ghosh MC, et al. CXCL12-induced partitioning of flotillin-1 with lipid rafts  
392 plays a role in CXCR4 function. *Eur J Immunol* **2007**; 37:2104-16.
- 393 42. Mielich-Suss B, Schneider J, Lopez D. Overproduction of flotillin influences cell  
394 differentiation and shape in *Bacillus subtilis*. *mBio* **2013**; 4:e00719-13.
- 395 43. Maia LF, Kaeser SA, Reichwald J, et al. Changes in amyloid-beta and Tau in the  
396 cerebrospinal fluid of transgenic mice overexpressing amyloid precursor protein. *Sci Transl Med*  
397 **2013**; 5:194re2.
- 398 44. Buerger K, Ewers M, Pirttila T, et al. CSF phosphorylated tau protein correlates with  
399 neocortical neurofibrillary pathology in Alzheimer's disease. *Brain* **2006**; 129:3035-41.
- 400 45. Cho YY, Kwon OH, Chung S. Preferred Endocytosis of Amyloid Precursor Protein from  
401 Cholesterol-Enriched Lipid Raft Microdomains. *Molecules* **2020**; 25:5490.
- 402

**Table 1. Results of Nef analysis in experimental samples.**

| Study ID | SN20 | 3D12 | EH1 | 6JR |
|----------|------|------|-----|-----|
| HAND 2   | -    | -    | -   | -   |
| HAND 3   | +    | +    | +   | +   |
| HAND 4   | -    | -    | -   | -   |
| HAND 6   | +    | +    | +   | +   |
| HAND 7   | +    | +    | +   | +   |
| HAND 11  | +    | +    | +   | -   |
| HAND 12  | -    | +    | -   | -   |
| HAND 13  | +    | +    | +   | +   |
| HAND 14  | -    | -    | +   | -   |
| HAND 15  | -    | -    | -   | -   |
| HAND 16  | +    | -    | -   | -   |
| HAND 17  | +    | +    | +   | +   |
| HAND 18  | -    | -    | -   | +   |
| HAND 25  | -    | -    | -   | -   |
| HAND 26  | +    | -    | -   | -   |
| HAND 27  | -    | -    | -   | -   |
| HAND 28  | -    | -    | +   | -   |
| HAND 29  | +    | +    | +   | +   |
| HAND 30  | -    | -    | -   | -   |
| HAND 41  | ND   | ND   | ND  | +   |
| HAND 44  | ND   | ND   | ND  | -   |
| HAND 45  | ND   | ND   | ND  | -   |
| HIV 1    | -    | -    | -   | -   |
| HIV 5    | -    | -    | -   | -   |
| HIV 8    | +    | -    | -   | -   |
| HIV 9    | -    | -    | -   | -   |
| HIV 10   | +    | +    | -   | -   |
| HIV 19   | +    | +    | +   | +   |
| HIV 20   | +    | -    | -   | -   |
| HIV 24   | -    | -    | -   | -   |
| HIV 40   | ND   | ND   | ND  | -   |
| HIV 42   | ND   | ND   | ND  | -   |
| HIV 43   | ND   | ND   | ND  | -   |
| Uninf 21 | +    | -    | -   | -   |
| Uninf 22 | +    | -    | -   | -   |
| Uninf 23 | +    | -    | -   | -   |
| Uninf 31 | +    | -    | -   | -   |
| Uninf 32 | -    | -    | -   | -   |
| Uninf 33 | ND   | ND   | ND  | -   |
| Uninf 34 | -    | -    | -   | -   |
| Uninf 35 | +    | -    | -   | -   |
| Uninf 36 | -    | -    | -   | -   |
| Uninf 37 | +    | -    | -   | -   |
| Uninf 38 | -    | -    | ND  | -   |
| Uninf 39 | +    | -    | +   | -   |

ND – not done. + - Nef detected, - - Nef undetected.

**Table 2. HAND severity evaluation in donors of post-mortem brain samples<sup>A</sup>**

| <b>ID</b> | <b>Frascati score</b> | <b>AAN score</b> | <b>HAND score in the study</b> |
|-----------|-----------------------|------------------|--------------------------------|
| HAND 2    |                       | 3                | 3                              |
| HAND 3    |                       | 5                | 5                              |
| HAND 4    |                       | 4                | 4                              |
| HAND 6    |                       | 4                | 4                              |
| HAND 7    |                       | 5                | 5                              |
| HAND 11   |                       | 3                | 3                              |
| HAND 12   |                       | 2                | 2                              |
| HAND 13   |                       | 5                | 5                              |
| HAND 14   |                       | 3                | 3                              |
| HAND 15   |                       | 3                | 3                              |
| HAND 16   | 3                     |                  | 3                              |
| HAND 17   | 3                     |                  | 3                              |
| HAND 18   | 2                     |                  | 2                              |
| HAND 25   | 3                     |                  | 3                              |
| HAND 26   |                       | 3                | 3                              |
| HAND 27   |                       | 3                | 3                              |
| HAND 28   |                       | 3                | 3                              |
| HAND 29   |                       | 3                | 3                              |
| HAND 30   |                       | 3                | 3                              |
| HAND 41   | 5                     | 4                | 5                              |
| HAND 44   | 5                     | 4                | 5                              |
| HAND 45   | 3                     | 5                | 3                              |

<sup>A</sup>HAND score used in the study was based on Frascati score where available, and AAN score in other cases.

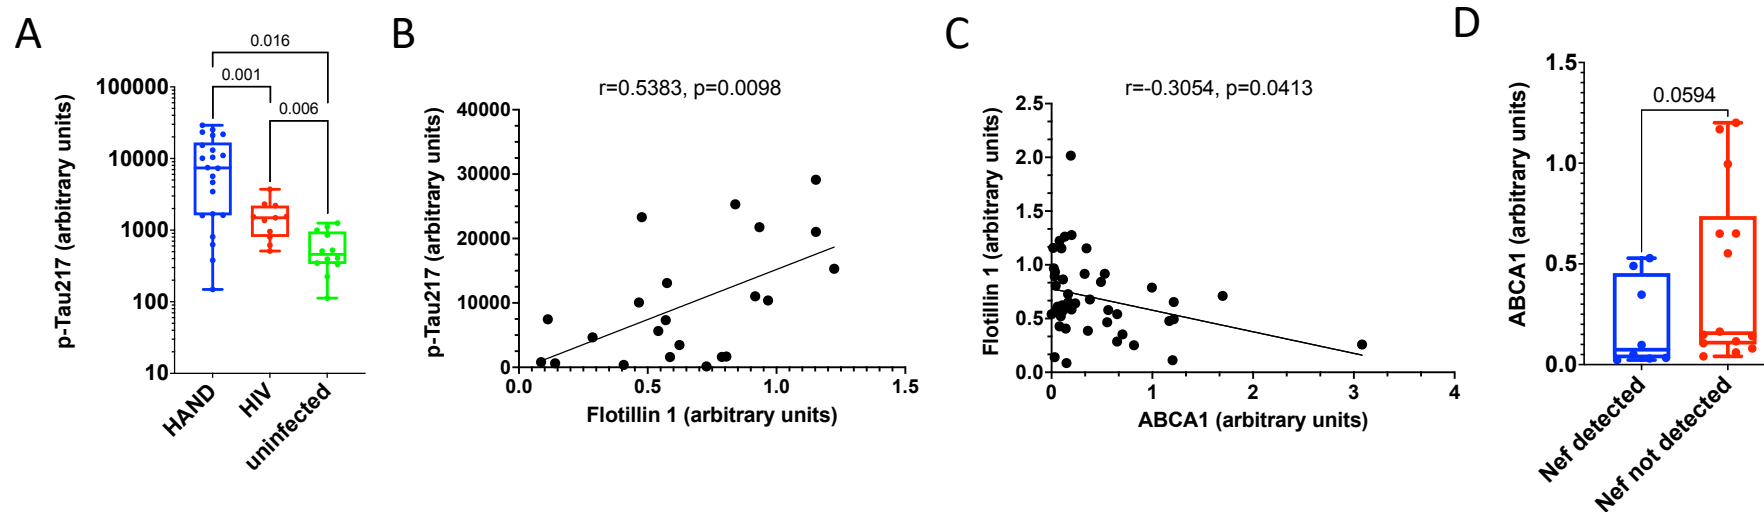

**Figure 1. Analysis of pathogenic correlates of HAND.** A – Analysis of p-Tau217 in brain samples from uninfected individuals and HIV-infected individuals with and without HAND. Data points representing p-Tau217 adjusted to total protein were obtained using ProteinSimple Compass software and are presented as arbitrary units. Group comparisons were made by Kruskal-Wallis test with post hoc Dwass, Steel, Critchlow-Fligner multiple comparison analysis adjustment for FWER (DSCF option in SAS NPAR1WAY procedure). B – Simple linear regression analysis of p-Tau217 and Flotillin 1 in HAND samples (data adjusted to total protein obtained using Compass software). C - Simple linear regression analysis of ABCA1 and Flotillin 1 in all samples (protein abundance adjusted to total protein was obtained using Compass software). D – Analysis of ABCA1 in HIV-infected (HAND-positive and HAND-negative samples) vs uninfected samples. Data points representing ABCA1 abundance adjusted to total protein were obtained using Compass and are presented as box and whiskers plot with p value calculated by Mann Whitney nonparametric two-tailed t test.

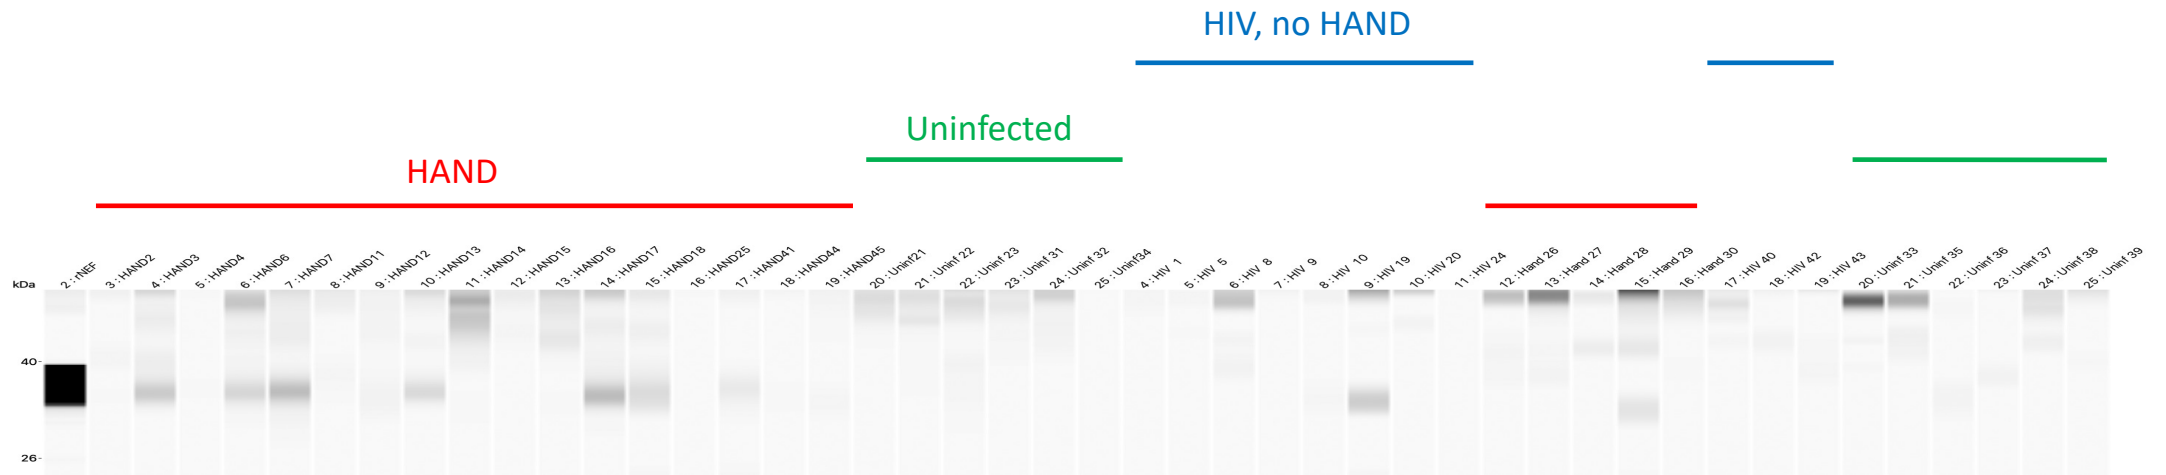

**Figure 2. Analysis of Nef in brain samples.** Brain lysates were assayed by Western immunoblot using the 6JR mouse monoclonal anti-Nef antibody from Abcam. Samples were run on ProteinSimple Jess instrument and analyzed by Compass software. Color-coded lines denote group assignment of the samples.

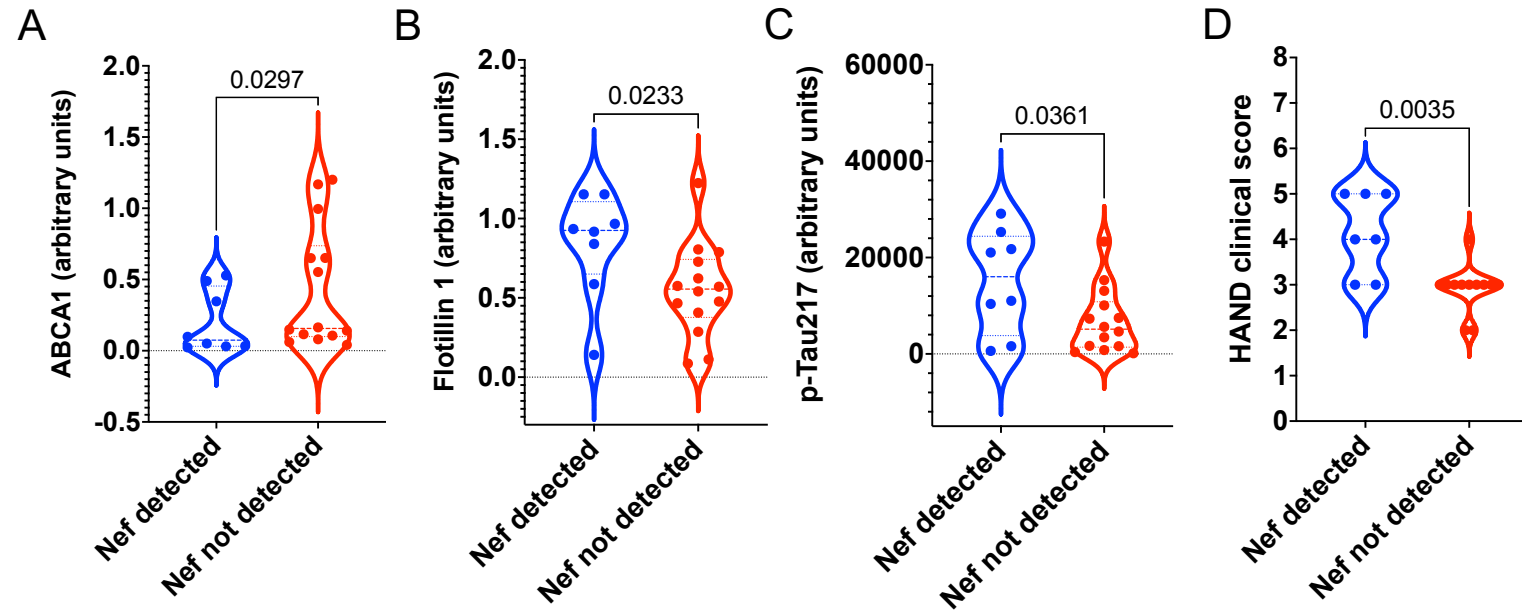

**Figure 3. Comparative analysis of Nef-positive and Nef-negative brain samples from HAND-diagnosed individuals.** A, B, C - Data points for ABCA1 (A), Flotillin 1 (B), and p-Tau217 (C) adjusted to total protein levels were obtained using ProteinSimple Compass software and are presented as arbitrary units. Results are presented as violin plots, showing p values calculated for unpaired parametric two-tailed t test. D – HAND clinical scores are presented for individuals from whom Nef-positive and Nef-negative brain samples were obtained as violin plots, showing p values calculated for unpaired non-parametric Mann-Whitney two-tailed t test.
